# Supplementary material for: Lifetime economic impact of the burden of childhood stunting attributable to maternal psychosocial risk factors in 137 low/middle-income countries
Source: PubMed Central journal article supplement — BMJ Glob Health. 2019 Jan 10;4(1):e001144. doi: 10.1136/bmjgh-2018-001144 (PMC6340061; doi:10.1136/bmjgh-2018-001144), 2019-01-10
Supplement: bmjgh-2018-001144supp001.pdf [file bmjgh-2018-001144supp001.pdf]

# Appendices

## Appendix Text

### **Description of conversion of stunting prevalence among children under 5 to stunting prevalence among children age 2**

To create the conversion factors, we used data from the WHO Database on Child Growth and Malnutrition.<sup>1</sup> Specifically, we used the latest nationally-representative survey since 2000 (for both sexes) from each country, for which both stunting prevalence among children age 0 to 59 months and among children age 24 to 35 months were available. This resulted in a dataset of 104 observations (from the same number of countries) from the 137 countries on our analysis list, from 2000 to 2014. We calculated country-specific ratios of stunting prevalence among children age 2 to stunting prevalence among children under 5. For those 33 countries (of the 137 developing countries in this analysis) without country-specific ratios, we used population-weighted means by sub-region. We then multiplied the country-specific stunting prevalence among children under 5 from the Nutrition Impact Model Study (NIMS)<sup>2</sup> these ratios to convert the prevalence values to prevalence of stunting among children age 2. We used the same methodology to convert mean HAZ among children under 5 from NIMS to mean HAZ among children age 2 (using data from 102 surveys from the WHO Database on Child Growth and Malnutrition that had both stunting prevalence among children age 0 to 59 months and among children age 24 to 35 months). Additional details and the country-specific ratios used (either directly or in population-weighted averages by sub-region for missing countries) are visible in Appendix Table 2 in Danaei et al.<sup>3</sup>

### **Description of methods used to estimate economic loss attributable to risk factors**

In order to estimate the income loss associated with each of the risk factors considered here, we combined our PAFs with estimates of the total lifetime wage income lost attributable to poor linear growth among a cohort of babies born in 2010. This generated estimates of the lifetime wage income lost attributable to each of the risk factors considered in this analysis. The estimates of the wage income losses due to suboptimal height-for-age Z-scores (HAZ) are from previous work done by our group (described in detail in Fink et al.<sup>4</sup>).

In order to apply our PAFs to these estimates of wage income loss due to suboptimal HAZ, the relationship between HAZ and stunting (height-for-age Z-score less than -2) prevalence must be roughly linear. To assess the veracity of this assumption, we used 309 (nationally representative, for both sexes) data points from the WHO Database on Child Growth and Malnutrition<sup>1</sup> from 120 countries and 15 years (2000-2014) where mean HAZ and stunting prevalence were estimated for the same population. The raw data and a linear regression model fit are presented below (Appendix Figure 3). While not perfectly linear at the extremes, we are confident that the relationship between stunting and HAZ is approximately linear over the range of stunting values applicable to the 137 developing countries in this analysis. We also used a spline fit to capture this relationship and the results remained the same.

The steps in this analysis are described below:

- 1) Compute cohort-level lifetime wage income losses associated with suboptimal HAZ (using the main model outlined in the methods section of Fink et al.<sup>4</sup>)
- 2) Compute the PAFs of stunting attributable to each of the psychosocial risk factors (described in this paper's methods section)
- 3) Assess the linearity of the relationship between HAZ and stunting prevalence (described above and visualized in Appendix Figure 3); linearity makes step 4 valid
- 4) Multiply the PAFs (step 2) by the lifetime wage income losses associated with suboptimal HAZ (step 1)

We incorporated uncertainty at every step of the analysis:

- i. Uncertainty in baseline stunting prevalence (standard errors obtained from NIMS project)
- ii. Uncertainty in the PAFs (based on uncertainty in relative risks and risk factor prevalences)
- iii. Uncertainty in resulting increase in schooling (standard errors obtained from Adair et al.<sup>5</sup>)
- iv. Uncertainty in wage gains from schooling (estimated as described in Fink et al.<sup>4</sup>)

For bootstrapping, we take independent random draws from each of the distributions.

**Appendix Table 1:** List of 137 countries and their corresponding sub-region and region

| <b>Country name</b>                   | <b>Sub-region</b>            | <b>Region</b>            |
|---------------------------------------|------------------------------|--------------------------|
| Afghanistan                           | Asia, South                  | South Asia               |
| Algeria                               | North Africa / Middle East   | North Africa/Middle East |
| Angola                                | Sub-Saharan Africa, Central  | Sub-Saharan Africa       |
| Antigua and Barbuda                   | Caribbean                    | Latin America/Caribbean  |
| Argentina                             | Latin America, Southern      | Latin America/Caribbean  |
| Armenia                               | Asia, Central                | Central Asia             |
| Azerbaijan                            | Asia, Central                | Central Asia             |
| Bahamas                               | Caribbean                    | Latin America/Caribbean  |
| Bahrain                               | North Africa / Middle East   | North Africa/Middle East |
| Bangladesh                            | Asia, South                  | South Asia               |
| Barbados                              | Caribbean                    | Latin America/Caribbean  |
| Belize                                | Caribbean                    | Latin America/Caribbean  |
| Benin                                 | Sub-Saharan Africa, West     | Sub-Saharan Africa       |
| Bhutan                                | Asia, South                  | South Asia               |
| Bolivia                               | Latin America, Andean        | Latin America/Caribbean  |
| Botswana                              | Sub-Saharan Africa, Southern | Sub-Saharan Africa       |
| Brazil                                | Latin America, Tropical      | Latin America/Caribbean  |
| Burkina Faso                          | Sub-Saharan Africa, West     | Sub-Saharan Africa       |
| Burundi                               | Sub-Saharan Africa, East     | Sub-Saharan Africa       |
| Cambodia                              | Asia, Southeast              | East Asia/Pacific        |
| Cameroon                              | Sub-Saharan Africa, West     | Sub-Saharan Africa       |
| Cape Verde                            | Sub-Saharan Africa, West     | Sub-Saharan Africa       |
| Central African Republic              | Sub-Saharan Africa, Central  | Sub-Saharan Africa       |
| Chad                                  | Sub-Saharan Africa, West     | Sub-Saharan Africa       |
| Chile                                 | Latin America, Southern      | Latin America/Caribbean  |
| China                                 | Asia, East                   | East Asia/Pacific        |
| Colombia                              | Latin America, Central       | Latin America/Caribbean  |
| Comoros                               | Sub-Saharan Africa, East     | Sub-Saharan Africa       |
| Congo                                 | Sub-Saharan Africa, Central  | Sub-Saharan Africa       |
| Costa Rica                            | Latin America, Central       | Latin America/Caribbean  |
| Cote d'Ivoire                         | Sub-Saharan Africa, West     | Sub-Saharan Africa       |
| Cuba                                  | Caribbean                    | Latin America/Caribbean  |
| Democratic People's Republic of Korea | Asia, East                   | East Asia/Pacific        |
| Democratic Republic of the Congo      | Sub-Saharan Africa, Central  | Sub-Saharan Africa       |
| Djibouti                              | Sub-Saharan Africa, East     | Sub-Saharan Africa       |
| Dominica                              | Caribbean                    | Latin America/Caribbean  |
| Dominican Republic                    | Caribbean                    | Latin America/Caribbean  |
| Ecuador                               | Latin America, Andean        | Latin America/Caribbean  |

|                                  |                              |                          |
|----------------------------------|------------------------------|--------------------------|
| Egypt                            | North Africa / Middle East   | North Africa/Middle East |
| El Salvador                      | Latin America, Central       | Latin America/Caribbean  |
| Equatorial Guinea                | Sub-Saharan Africa, Central  | Sub-Saharan Africa       |
| Eritrea                          | Sub-Saharan Africa, East     | Sub-Saharan Africa       |
| Ethiopia                         | Sub-Saharan Africa, East     | Sub-Saharan Africa       |
| Fiji                             | Oceania                      | East Asia/Pacific        |
| Gabon                            | Sub-Saharan Africa, Central  | Sub-Saharan Africa       |
| Gambia                           | Sub-Saharan Africa, West     | Sub-Saharan Africa       |
| Georgia                          | Asia, Central                | Central Asia             |
| Ghana                            | Sub-Saharan Africa, West     | Sub-Saharan Africa       |
| Grenada                          | Caribbean                    | Latin America/Caribbean  |
| Guatemala                        | Latin America, Central       | Latin America/Caribbean  |
| Guinea                           | Sub-Saharan Africa, West     | Sub-Saharan Africa       |
| Guinea-Bissau                    | Sub-Saharan Africa, West     | Sub-Saharan Africa       |
| Guyana                           | Caribbean                    | Latin America/Caribbean  |
| Haiti                            | Caribbean                    | Latin America/Caribbean  |
| Honduras                         | Latin America, Central       | Latin America/Caribbean  |
| India                            | Asia, South                  | South Asia               |
| Indonesia                        | Asia, Southeast              | East Asia/Pacific        |
| Iran (Islamic Republic of)       | North Africa / Middle East   | North Africa/Middle East |
| Iraq                             | North Africa / Middle East   | North Africa/Middle East |
| Jamaica                          | Caribbean                    | Latin America/Caribbean  |
| Jordan                           | North Africa / Middle East   | North Africa/Middle East |
| Kazakhstan                       | Asia, Central                | Central Asia             |
| Kenya                            | Sub-Saharan Africa, East     | Sub-Saharan Africa       |
| Kiribati                         | Oceania                      | East Asia/Pacific        |
| Kuwait                           | North Africa / Middle East   | North Africa/Middle East |
| Kyrgyzstan                       | Asia, Central                | Central Asia             |
| Lao People's Democratic Republic | Asia, Southeast              | East Asia/Pacific        |
| Lebanon                          | North Africa / Middle East   | North Africa/Middle East |
| Lesotho                          | Sub-Saharan Africa, Southern | Sub-Saharan Africa       |
| Liberia                          | Sub-Saharan Africa, West     | Sub-Saharan Africa       |
| Libyan Arab Jamahiriya           | North Africa / Middle East   | North Africa/Middle East |
| Madagascar                       | Sub-Saharan Africa, East     | Sub-Saharan Africa       |
| Malawi                           | Sub-Saharan Africa, East     | Sub-Saharan Africa       |
| Malaysia                         | Asia, Southeast              | East Asia/Pacific        |
| Maldives                         | Asia, Southeast              | East Asia/Pacific        |
| Mali                             | Sub-Saharan Africa, West     | Sub-Saharan Africa       |
| Marshall Islands                 | Oceania                      | East Asia/Pacific        |
| Mauritania                       | Sub-Saharan Africa, West     | Sub-Saharan Africa       |
| Mauritius                        | Asia, Southeast              | East Asia/Pacific        |
| Mexico                           | Latin America, Central       | Latin America/Caribbean  |
| Micronesia (Federated States of) | Oceania                      | East Asia/Pacific        |

|                       |                              |                            |
|-----------------------|------------------------------|----------------------------|
| Mongolia              | Asia, Central                | Central Asia               |
| Morocco               | North Africa / Middle East   | North Africa/Middle East   |
| Mozambique            | Sub-Saharan Africa, East     | Sub-Saharan Africa         |
| Myanmar               | Asia, Southeast              | East Asia/Pacific          |
| Namibia               | Sub-Saharan Africa, Southern | Sub-Saharan Africa         |
| Nepal                 | Asia, South                  | South Asia                 |
| Nicaragua             | Latin America, Central       | Latin America/Caribbean    |
| Niger                 | Sub-Saharan Africa, West     | Sub-Saharan Africa         |
| Nigeria               | Sub-Saharan Africa, West     | Sub-Saharan Africa         |
| Oman                  | North Africa / Middle East   | North Africa/Middle East   |
| Pakistan              | Asia, South                  | South Asia                 |
| Panama                | Latin America, Central       | Latin America/Caribbean    |
| Papua New Guinea      | Oceania                      | East Asia/Pacific          |
| Paraguay              | Latin America, Tropical      | Latin America/Caribbean    |
| Peru                  | Latin America, Andean        | Latin America/Caribbean    |
| Philippines           | Asia, Southeast              | East Asia/Pacific          |
| Qatar                 | North Africa / Middle East   | North Africa/Middle East   |
| Rwanda                | Sub-Saharan Africa, East     | Sub-Saharan Africa         |
| Samoa                 | Oceania                      | East Asia/Pacific          |
| Sao Tome and Principe | Sub-Saharan Africa, West     | Sub-Saharan Africa         |
| Saudi Arabia          | North Africa / Middle East   | North Africa/Middle East   |
| Senegal               | Sub-Saharan Africa, West     | Sub-Saharan Africa         |
| Seychelles            | Asia, Southeast              | East Asia/Pacific          |
| Sierra Leone          | Sub-Saharan Africa, West     | Sub-Saharan Africa         |
| Solomon Islands       | Oceania                      | East Asia/Pacific          |
| Somalia               | Sub-Saharan Africa, East     | Sub-Saharan Africa         |
| South Africa          | Sub-Saharan Africa, Southern | Sub-Saharan Africa         |
| Sri Lanka             | Asia, Southeast              | East Asia/Pacific          |
| St. Lucia             | Caribbean                    | Latin America/Caribbean    |
| St. Vincent           | Caribbean                    | Latin America/Caribbean    |
| State of Palestine    | North Africa / Middle East   | North Africa / Middle East |
| Sudan                 | Sub-Saharan Africa, East     | Sub-Saharan Africa         |
| Suriname              | Caribbean                    | Latin America/Caribbean    |
| Swaziland             | Sub-Saharan Africa, Southern | Sub-Saharan Africa         |
| Syrian Arab Republic  | North Africa / Middle East   | North Africa/Middle East   |
| Taiwan                | Asia, East                   | East Asia/Pacific          |
| Tajikistan            | Asia, Central                | Central Asia               |
| Thailand              | Asia, Southeast              | East Asia/Pacific          |
| Timore Leste          | Asia, Southeast              | East Asia/Pacific          |
| Togo                  | Sub-Saharan Africa, West     | Sub-Saharan Africa         |
| Tonga                 | Oceania                      | East Asia/Pacific          |
| Trinidad and Tobago   | Caribbean                    | Latin America/Caribbean    |
| Tunisia               | North Africa / Middle East   | North Africa/Middle East   |

|                             |                              |                          |
|-----------------------------|------------------------------|--------------------------|
| Turkey                      | North Africa / Middle East   | North Africa/Middle East |
| Turkmenistan                | Asia, Central                | Central Asia             |
| Uganda                      | Sub-Saharan Africa, East     | Sub-Saharan Africa       |
| United Arab Emirates        | North Africa / Middle East   | North Africa/Middle East |
| United Republic of Tanzania | Sub-Saharan Africa, East     | Sub-Saharan Africa       |
| Uruguay                     | Latin America, Southern      | Latin America/Caribbean  |
| Uzbekistan                  | Asia, Central                | Central Asia             |
| Vanuatu                     | Oceania                      | East Asia/Pacific        |
| Venezuela                   | Latin America, Central       | Latin America/Caribbean  |
| Viet Nam                    | Asia, Southeast              | East Asia/Pacific        |
| Yemen                       | North Africa / Middle East   | North Africa/Middle East |
| Zambia                      | Sub-Saharan Africa, East     | Sub-Saharan Africa       |
| Zimbabwe                    | Sub-Saharan Africa, Southern | Sub-Saharan Africa       |

**Appendix Table 2:** Population attributable fraction (PAF in %) and number of stunting cases (in thousands) attributable to the joint impact of intimate partner violence, maternal depression, and low maternal education, assuming different scenarios of the percent of excess relative risk of IPV that is mediated through maternal depression, by region (95% confidence intervals in parentheses) (25% mediation was used for the main analysis; the results below indicate that different mediation scenarios do not show large differences at the global or regional levels)

| Region                       | 25% mediation        |                       | No mediation         |                       | 50% mediation       |                       |
|------------------------------|----------------------|-----------------------|----------------------|-----------------------|---------------------|-----------------------|
|                              | PAF (%)              | Number stunted        | PAF (%)              | Number stunted        | PAF (%)             | Number stunted        |
| All developing countries     | 16.4<br>(9.9, 25.7)  | 7235<br>(4405, 11524) | 17.4<br>(11.0, 26.6) | 7666<br>(4857, 11943) | 15.4<br>(8.8, 24.7) | 6792<br>(3951, 11054) |
| East Asia and Pacific        | 12.1<br>(6.3, 21.2)  | 886<br>(458, 1542)    | 12.8<br>(7.0, 21.7)  | 933<br>(506, 1583)    | 11.5<br>(5.6, 20.6) | 839<br>(403, 1500)    |
| South Asia                   | 16.8<br>(10.4, 25.7) | 2802<br>(1687, 4461)  | 17.9<br>(11.6, 26.7) | 2981<br>(1845, 4620)  | 15.7<br>(9.2, 24.8) | 2619<br>(1505, 4297)  |
| Central Asia                 | 9.8<br>(2.7, 20.2)   | 44<br>(12, 91)        | 10.5<br>(3.5, 20.8)  | 47<br>(15, 94)        | 9.2<br>(1.9, 19.6)  | 41<br>(9, 88)         |
| North Africa and Middle East | 17.5<br>(9.2, 29.6)  | 453<br>(232, 767)     | 18.4<br>(10.1, 30.3) | 476<br>(256, 786)     | 16.6<br>(8.1, 28.8) | 429<br>(208, 748)     |
| Sub-Saharan Africa           | 18.3<br>(11.7, 27.9) | 2813<br>(1800, 4284)  | 19.4<br>(12.9, 28.8) | 2978<br>(1975, 4436)  | 17.2<br>(10.6, 27)  | 2643<br>(1618, 4140)  |
| Latin America and Caribbean  | 13.5<br>(7.0, 23.2)  | 237<br>(120, 405)     | 14.3<br>(7.9, 23.9)  | 251<br>(136, 417)     | 12.7<br>(6.0, 22.4) | 222<br>(104, 392)     |

**Appendix Table 3:** Population attributable fraction (PAF in %) and number of stunting cases (in hundreds) attributable to each of 4 psychosocial risks and maternal depression, low maternal education, and intimate partner violence jointly, by country (95% confidence intervals in parentheses)

| Country             | Low maternal education |                 | Maternal depression |                  | Intimate partner violence |                | Orphanhood <sup>a</sup> |                | Joint             |                   |
|---------------------|------------------------|-----------------|---------------------|------------------|---------------------------|----------------|-------------------------|----------------|-------------------|-------------------|
|                     | PAF (%)                | Number stunted  | PAF (%)             | Number stunted   | PAF (%)                   | Number stunted | PAF (%)                 | Number stunted | PAF (%)           | Number stunted    |
| Afghanistan         | 9.9 (9.4, 10.4)        | 630 (483, 786)  | 27.3 (-0.3, 54.0)   | 1731 (-16, 3509) | 5.2 (3.8, 6.6)            | 327 (217, 453) |                         |                | 37.1 (13.2, 60.3) | 2352 (815, 3971)  |
| Algeria             | 4.6 (4.4, 4.9)         | 78 (49, 106)    | 10.3 (-0.1, 24.6)   | 174 (-1, 441)    | 4.4 (3.3, 5.6)            | 74 (42, 110)   |                         |                | 17.3 (7.9, 30.7)  | 292 (116, 565)    |
| Angola              | 7.0 (6.7, 7.2)         | 259 (170, 351)  | 7.5 (-0.1, 18.2)    | 280 (-2, 724)    | 7.9 (5.8, 10.2)           | 292 (180, 428) | 0.02 (0.01, 0.03)       | 1 (0, 1)       | 19.1 (12.5, 28.5) | 712 (405, 1173)   |
| Antigua and Barbuda | 2.6 (2.4, 2.7)         | 0 (0, 0)        | 10.1 (-0.1, 24.6)   | 0 (0, 1)         | 3.4 (2.4, 4.5)            | 0 (0, 0)       |                         |                | 14.6 (5.1, 28.0)  | 0 (0, 1)          |
| Argentina           | 2.9 (2.7, 3.1)         | 17 (8, 27)      | 7.7 (-0.1, 19.1)    | 45 (0, 122)      | 3.0 (1.5, 4.7)            | 18 (7, 33)     |                         |                | 12.5 (5.4, 23.1)  | 74 (25, 152)      |
| Armenia             | 0.4 (0.3, 0.4)         | 0 (0, 0)        | 8.3 (-0.1, 20.5)    | 6 (0, 14)        | 2.9 (1.9, 4.0)            | 2 (1, 3)       |                         |                | 10.6 (2.6, 22.4)  | 8 (2, 16)         |
| Azerbaijan          | 0.7 (0.6, 0.7)         | 3 (2, 4)        | 6.6 (0.0, 16.0)     | 25 (0, 65)       | 2.9 (1.9, 4.1)            | 11 (6, 18)     |                         |                | 9.2 (3.2, 18.5)   | 35 (9, 75)        |
| Bahamas             | 0.3 (0.3, 0.4)         | 0 (0, 0)        | 7.9 (0.0, 19.2)     | 1 (0, 2)         | 3.4 (2.4, 4.6)            | 0 (0, 0)       |                         |                | 10.6 (3.0, 21.7)  | 1 (0, 2)          |
| Bahrain             | 1.4 (1.3, 1.4)         | 0 (0, 0)        | 13.2 (-0.1, 29.7)   | 3 (0, 7)         | 4.4 (3.3, 5.6)            | 1 (0, 2)       |                         |                | 17.2 (4.6, 33.2)  | 4 (1, 8)          |
| Bangladesh          | 5.8 (5.6, 6.1)         | 829 (647, 1012) | 5.2 (0.0, 13.5)     | 737 (-5, 1853)   | 5.1 (3.8, 6.4)            | 732 (502, 979) |                         |                | 14.2 (9.5, 21.6)  | 2020 (1285, 3108) |
| Barbados            | 0.4 (0.4, 0.4)         | 0 (0, 0)        | 8.1 (-0.1, 20.3)    | 0 (0, 1)         | 3.4 (2.3, 4.5)            | 0 (0, 0)       |                         |                | 10.8 (3.1, 22.4)  | 1 (0, 2)          |
| Belize              | 4.8 (4.5, 5.1)         | 1 (0, 1)        | 8.1 (-0.1, 19.5)    | 1 (0, 3)         | 3.4 (2.4, 4.5)            | 1 (0, 1)       |                         |                | 14.8 (7.3, 25.0)  | 2 (1, 4)          |
| Benin               | 8.9 (8.5, 9.3)         | 137 (104, 174)  | 5.6 (0.0, 14.7)     | 87 (-1, 225)     | 5.2 (3.6, 6.7)            | 80 (51, 116)   | 0.02 (0.01, 0.03)       | 0 (0, 0)       | 17.4 (12.3, 25.3) | 268 (171, 410)    |
| Bhutan              | 7.5 (7.1, 7.8)         | 4 (3, 5)        | 6.1 (0.0, 15.4)     | 3 (0, 8)         | 5.2 (3.9, 6.5)            | 3 (2, 4)       |                         |                | 16.5 (11.1, 25.0) | 9 (5, 13)         |
| Bolivia             | 2.6 (2.5, 2.8)         | 21 (17, 25)     | 5.9 (0.0, 15.0)     | 48 (0, 124)      | 5.0 (3.8, 6.4)            | 41 (28, 54)    |                         |                | 11.8 (6.3, 20.5)  | 96 (49, 168)      |

|                                       |                  |                |                   |                 |                 |                 |                   |          |                   |                  |
|---------------------------------------|------------------|----------------|-------------------|-----------------|-----------------|-----------------|-------------------|----------|-------------------|------------------|
| Botswana                              | 0.7 (0.7, 0.8)   | 1 (1, 2)       | 10.8 (-0.1, 25.4) | 18 (0, 46)      | 3.7 (2.7, 4.8)  | 6 (4, 9)        | 0.03 (0.02, 0.05) | 0 (0, 0) | 13.9 (3.6, 27.8)  | 24 (6, 51)       |
| Brazil                                | 3.7 (3.5, 3.9)   | 107 (65, 147)  | 8.2 (-0.1, 20.3)  | 236 (-1, 608)   | 3.5 (2.4, 4.7)  | 100 (55, 155)   |                   |          | 13.9 (6.3, 25.1)  | 401 (162, 778)   |
| Burkina Faso                          | 9.9 (9.4, 10.4)  | 304 (256, 352) | 6.4 (0.0, 16.2)   | 198 (-1, 501)   | 5.2 (3.6, 6.8)  | 159 (107, 216)  | 0.03 (0.01, 0.05) | 1 (0, 1) | 19.0 (13.4, 27.4) | 585 (388, 865)   |
| Burundi                               | 9.7 (9.3, 10.1)  | 258 (230, 289) | 8.8 (-0.1, 21.7)  | 234 (-2, 581)   | 4.8 (3.6, 6.0)  | 127 (94, 164)   | 0.03 (0.01, 0.06) | 1 (0, 2) | 20.7 (13.0, 31.8) | 549 (336, 850)   |
| Cambodia                              | 8.5 (8.1, 8.9)   | 132 (113, 151) | 7.3 (0.0, 18.4)   | 113 (-1, 282)   | 3.5 (2.5, 4.5)  | 55 (38, 73)     |                   |          | 17.4 (11.0, 27.1) | 271 (166, 422)   |
| Cameroon                              | 7.0 (6.6, 7.4)   | 228 (187, 277) | 6.5 (-0.1, 16.3)  | 212 (-2, 530)   | 5.1 (3.7, 6.7)  | 167 (119, 231)  | 0.03 (0.01, 0.05) | 1 (0, 2) | 16.4 (10.6, 25.4) | 536 (329, 838)   |
| Cape Verde                            | 8.6 (8.2, 9.0)   | 2 (1, 3)       | 7.6 (-0.1, 18.2)  | 2 (0, 5)        | 5.2 (3.8, 6.8)  | 1 (1, 2)        | 0.0 (0.0, 0.01)   | 0 (0, 0) | 18.9 (12.2, 28.3) | 5 (2, 8)         |
| Central African Republic              | 9.6 (9.2, 10.0)  | 73 (56, 91)    | 8.5 (-0.1, 21.2)  | 66 (-1, 167)    | 7.9 (5.6, 10.1) | 61 (39, 83)     | 0.04 (0.02, 0.07) | 0 (0, 1) | 22.2 (15.2, 32.6) | 171 (105, 264)   |
| Chad                                  | 10.0 (9.6, 10.4) | 292 (201, 385) | 7.7 (0.0, 18.4)   | 225 (-1, 561)   | 5.1 (3.6, 6.7)  | 150 (90, 227)   | 0.03 (0.01, 0.05) | 1 (0, 2) | 20.2 (13.5, 29.4) | 590 (337, 939)   |
| Chile                                 | 1.6 (1.5, 1.7)   | 1 (1, 1)       | 6.0 (0.0, 15.2)   | 3 (0, 8)        | 3.0 (1.7, 4.5)  | 2 (1, 3)        |                   |          | 9.6 (4.0, 18.6)   | 5 (2, 11)        |
| China                                 | 2.2 (2.1, 2.4)   | 642 (423, 865) | 4.6 (0.0, 12.1)   | 1319 (-8, 3457) | 2.1 (1.1, 3.2)  | 596 (278, 1012) |                   |          | 8.2 (3.8, 15.3)   | 2351 (948, 4550) |
| Colombia                              | 3.6 (3.4, 3.9)   | 46 (37, 56)    | 9.3 (-0.1, 22.3)  | 119 (-1, 307)   | 3.7 (2.7, 4.8)  | 47 (32, 65)     |                   |          | 15.0 (6.5, 27.3)  | 192 (79, 371)    |
| Comoros                               | 6.9 (6.6, 7.2)   | 7 (5, 9)       | 9.3 (-0.1, 22.5)  | 9 (0, 23)       | 4.8 (3.6, 6.1)  | 5 (3, 7)        | 0.02 (0.01, 0.03) | 0 (0, 0) | 18.6 (10.5, 30.5) | 18 (9, 32)       |
| Congo                                 | 5.1 (4.8, 5.3)   | 24 (15, 32)    | 9.5 (-0.1, 22.8)  | 44 (0, 113)     | 7.9 (5.7, 10.2) | 36 (21, 54)     | 0.02 (0.01, 0.03) | 0 (0, 0) | 19.3 (10.8, 31.0) | 89 (43, 160)     |
| Costa Rica                            | 3.1 (2.9, 3.4)   | 2 (1, 3)       | 7.2 (0.0, 17.8)   | 5 (0, 13)       | 3.7 (2.7, 4.8)  | 2 (1, 4)        |                   |          | 12.6 (5.9, 22.8)  | 8 (3, 17)        |
| Cote d'Ivoire                         | 9.0 (8.6, 9.4)   | 301 (221, 378) | 7.9 (-0.1, 19.4)  | 263 (-2, 664)   | 5.2 (3.6, 6.7)  | 173 (110, 247)  | 0.03 (0.01, 0.05) | 1 (0, 2) | 19.4 (12.6, 29.3) | 650 (375, 1042)  |
| Cuba                                  | 0.5 (0.5, 0.5)   | 1 (0, 1)       | 9.0 (-0.1, 22.2)  | 11 (0, 28)      | 3.4 (2.4, 4.6)  | 4 (1, 7)        |                   |          | 11.8 (3.0, 24.4)  | 14 (3, 32)       |
| Democratic People's Republic of Korea | 1.2 (1.1, 1.3)   | 20 (14, 25)    | 4.1 (0.0, 10.3)   | 65 (0, 172)     | 2.1 (1.1, 3.2)  | 33 (16, 54)     |                   |          | 6.7 (2.7, 12.7)   | 107 (42, 217)    |



|                                  |                  |                   |                   |                 |                 |                  |                   |          |                   |                   |
|----------------------------------|------------------|-------------------|-------------------|-----------------|-----------------|------------------|-------------------|----------|-------------------|-------------------|
| Democratic Republic of the Congo | 9.2 (8.8, 9.6)   | 1268 (1087, 1471) | 8.9 (-0.1, 21.6)  | 1222 (-8, 2934) | 7.9 (5.7, 10.1) | 1084 (747, 1441) | 0.03 (0.01, 0.05) | 4 (1, 7) | 22.2 (14.6, 32.9) | 3064 (1892, 4551) |
| Djibouti                         | 8.3 (8.0, 8.7)   | 5 (3, 7)          | 10.2 (-0.1, 24.8) | 6 (0, 15)       | 4.8 (3.6, 6.1)  | 3 (2, 4)         |                   |          | 20.7 (11.8, 33.7) | 13 (6, 21)        |
| Dominica                         | 2.6 (2.4, 2.7)   | 0 (0, 0)          | 8.2 (0.0, 20.0)   | 0 (0, 0)        | 3.4 (2.4, 4.5)  | 0 (0, 0)         |                   |          | 12.8 (5.1, 23.9)  | 0 (0, 0)          |
| Dominican Republic               | 3.7 (3.5, 4.0)   | 9 (6, 12)         | 6.8 (0.0, 17.3)   | 16 (0, 41)      | 3.4 (2.3, 4.6)  | 8 (5, 12)        |                   |          | 12.6 (6.3, 22.4)  | 30 (13, 56)       |
| Ecuador                          | 4.4 (4.1, 4.6)   | 38 (26, 50)       | 6.6 (0.0, 16.5)   | 57 (0, 147)     | 5.0 (3.8, 6.3)  | 44 (27, 63)      |                   |          | 14.0 (8.1, 23.3)  | 122 (62, 213)     |
| Egypt                            | 4.2 (4.0, 4.4)   | 218 (147, 287)    | 8.3 (-0.1, 20.3)  | 433 (-2, 1146)  | 4.4 (3.3, 5.6)  | 230 (146, 337)   |                   |          | 15.0 (7.5, 26.3)  | 786 (349, 1484)   |
| El Salvador                      | 4.8 (4.5, 5.1)   | 12 (9, 14)        | 7.8 (-0.1, 19.3)  | 19 (0, 47)      | 3.7 (2.7, 4.7)  | 9 (6, 13)        |                   |          | 14.7 (7.6, 25.4)  | 37 (18, 62)       |
| Equatorial Guinea                | 7.0 (6.7, 7.2)   | 6 (4, 7)          | 10.4 (-0.1, 24.6) | 9 (0, 21)       | 7.9 (5.8, 10.1) | 6 (4, 9)         | 0.04 (0.02, 0.06) | 0 (0, 0) | 21.7 (12.8, 34.0) | 18 (9, 31)        |
| Eritrea                          | 7.1 (6.8, 7.4)   | 73 (52, 94)       | 9.0 (-0.1, 22.3)  | 93 (-1, 229)    | 4.8 (3.5, 6.0)  | 49 (31, 69)      | 0.01 (0.01, 0.02) | 0 (0, 0) | 18.6 (10.6, 30.6) | 191 (101, 325)    |
| Ethiopia                         | 10.0 (9.5, 10.5) | 1804 (1559, 2062) | 5.6 (0.0, 14.0)   | 1009 (-6, 2558) | 4.8 (3.6, 6.1)  | 867 (636, 1132)  | 0.02 (0.01, 0.03) | 3 (1, 6) | 18.1 (13.2, 25.4) | 3271 (2323, 4565) |
| Fiji                             | 1.7 (1.6, 1.8)   | 1 (0, 1)          | 5.5 (0.0, 13.8)   | 2 (0, 7)        | 4.4 (2.9, 6.1)  | 2 (0, 3)         |                   |          | 10.1 (4.8, 18.0)  | 4 (1, 9)          |
| Gabon                            | 3.7 (3.5, 3.9)   | 4 (2, 6)          | 10.9 (-0.1, 25.4) | 13 (0, 33)      | 7.9 (5.7, 10.1) | 9 (5, 14)        | 0.02 (0.01, 0.03) | 0 (0, 0) | 19.3 (9.4, 32.7)  | 22 (9, 42)        |
| Gambia                           | 8.3 (7.9, 8.8)   | 23 (16, 28)       | 8.1 (0.0, 20.0)   | 22 (0, 55)      | 5.1 (3.6, 6.8)  | 14 (9, 20)       | 0.02 (0.01, 0.04) | 0 (0, 0) | 19.0 (11.8, 29.2) | 52 (29, 85)       |
| Georgia                          | 0.7 (0.6, 0.7)   | 1 (0, 1)          | 7.5 (0.0, 18.5)   | 6 (0, 15)       | 2.9 (1.9, 4.0)  | 2 (1, 4)         |                   |          | 10.1 (2.9, 20.7)  | 8 (2, 18)         |
| Ghana                            | 5.0 (4.8, 5.2)   | 127 (100, 154)    | 6.5 (0.0, 16.0)   | 164 (-1, 422)   | 5.2 (3.7, 6.7)  | 131 (88, 183)    | 0.02 (0.01, 0.03) | 0 (0, 1) | 14.6 (8.8, 23.2)  | 372 (214, 627)    |
| Grenada                          | 2.6 (2.4, 2.7)   | 0 (0, 0)          | 8.1 (0.0, 19.9)   | 0 (0, 1)        | 3.4 (2.3, 4.5)  | 0 (0, 0)         |                   |          | 12.8 (5.2, 23.7)  | 0 (0, 1)          |
| Guatemala                        | 7.6 (7.2, 8.0)   | 168 (141, 197)    | 7.9 (-0.1, 19.7)  | 173 (-1, 423)   | 3.7 (2.7, 4.8)  | 82 (57, 111)     |                   |          | 17.3 (10.3, 27.9) | 381 (219, 603)    |
| Guinea                           | 9.9 (9.5, 10.4)  | 204 (160, 249)    | 6.2 (0.0, 15.8)   | 127 (-1, 315)   | 5.2 (3.7, 6.9)  | 106 (72, 148)    | 0.03 (0.01, 0.04) | 1 (0, 1) | 18.9 (13.5, 27.2) | 387 (259, 561)    |

|                                  |                |                   |                   |                   |                |                   |                   |            |                   |                      |
|----------------------------------|----------------|-------------------|-------------------|-------------------|----------------|-------------------|-------------------|------------|-------------------|----------------------|
| Guinea-Bissau                    | 8.6 (8.2, 9.0) | 24 (17, 31)       | 5.8 (0.0, 14.2)   | 16 (0, 41)        | 5.2 (3.7, 6.8) | 14 (9, 21)        | 0.03 (0.01, 0.06) | 0 (0, 0)   | 17.3 (12.1, 24.7) | 48 (30, 73)          |
| Guyana                           | 2.6 (2.4, 2.7) | 1 (1, 1)          | 9.2 (-0.1, 22.6)  | 2 (0, 6)          | 3.4 (2.4, 4.6) | 1 (1, 1)          |                   |            | 13.8 (5.2, 26.6)  | 4 (1, 7)             |
| Haiti                            | 7.8 (7.4, 8.1) | 62 (45, 80)       | 7.2 (0.0, 17.7)   | 58 (0, 147)       | 3.4 (2.3, 4.7) | 27 (17, 40)       |                   |            | 16.6 (10.0, 26.1) | 133 (73, 222)        |
| Honduras                         | 5.0 (4.6, 5.3) | 27 (20, 35)       | 12.6 (-0.1, 29.9) | 69 (0, 168)       | 3.7 (2.7, 4.8) | 20 (13, 29)       |                   |            | 19.3 (7.7, 35.1)  | 106 (41, 198)        |
| India                            | 6.4 (6.2, 6.7) | 7597 (5420, 9836) | 6.4 (0.0, 15.7)   | 7586 (-48, 19463) | 5.1 (3.8, 6.5) | 6074 (3884, 8557) | 0.02 (0.0, 0.03)  | 21 (5, 42) | 15.9 (10.2, 24.2) | 18735 (10934, 30900) |
| Indonesia                        | 6.8 (6.4, 7.1) | 1250 (966, 1539)  | 7.8 (-0.1, 18.8)  | 1435 (-8, 3664)   | 3.5 (2.5, 4.5) | 648 (438, 901)    |                   |            | 16.3 (9.3, 26.4)  | 3010 (1651, 5106)    |
| Iran (Islamic Republic of)       | 3.0 (2.9, 3.1) | 76 (41, 116)      | 10.2 (-0.1, 24.8) | 261 (-2, 696)     | 4.4 (3.3, 5.6) | 112 (56, 187)     |                   |            | 15.8 (6.4, 29.3)  | 403 (138, 841)       |
| Iraq                             | 7.1 (6.8, 7.4) | 218 (147, 292)    | 6.7 (0.0, 16.9)   | 204 (-2, 513)     | 4.4 (3.2, 5.6) | 136 (83, 193)     |                   |            | 16.2 (10.2, 25.2) | 497 (275, 809)       |
| Jamaica                          | 1.3 (1.2, 1.3) | 0 (0, 0)          | 7.3 (-0.1, 18.4)  | 1 (0, 3)          | 3.4 (2.3, 4.6) | 1 (0, 1)          |                   |            | 10.8 (4.2, 21.6)  | 2 (1, 4)             |
| Jordan                           | 2.5 (2.4, 2.6) | 5 (4, 7)          | 10.2 (-0.1, 24.3) | 21 (0, 52)        | 4.4 (3.2, 5.6) | 9 (6, 13)         |                   |            | 15.4 (5.9, 28.5)  | 32 (11, 61)          |
| Kazakhstan                       | 0.5 (0.5, 0.6) | 3 (2, 4)          | 6.5 (0.0, 16.5)   | 36 (0, 98)        | 2.9 (1.9, 4.1) | 16 (8, 26)        |                   |            | 9.0 (2.8, 18.6)   | 50 (15, 113)         |
| Kenya                            | 6.7 (6.3, 7.0) | 398 (318, 482)    | 7.5 (-0.1, 19.2)  | 449 (-3, 1101)    | 4.8 (3.6, 6.0) | 286 (203, 383)    | 0.02 (0.01, 0.04) | 1 (1, 2)   | 16.9 (10.2, 27.1) | 1005 (576, 1625)     |
| Kiribati                         | 4.5 (4.2, 4.7) | 0 (0, 1)          | 8.3 (-0.1, 20.3)  | 1 (0, 2)          | 4.4 (2.8, 6.2) | 0 (0, 1)          |                   |            | 15.3 (7.7, 26.6)  | 1 (0, 3)             |
| Kuwait                           | 4.1 (3.8, 4.3) | 1 (0, 1)          | 10.5 (-0.1, 25.3) | 1 (0, 3)          | 4.4 (3.2, 5.6) | 1 (0, 1)          |                   |            | 17.1 (7.6, 30.8)  | 2 (1, 4)             |
| Kyrgyzstan                       | 2.3 (2.1, 2.5) | 9 (5, 12)         | 7.2 (-0.1, 18.8)  | 27 (0, 74)        | 2.9 (1.8, 4.0) | 11 (5, 18)        |                   |            | 11.4 (4.5, 22.1)  | 43 (13, 91)          |
| Lao People's Democratic Republic | 6.7 (6.4, 7.0) | 55 (41, 69)       | 8.4 (-0.1, 20.4)  | 69 (0, 173)       | 3.5 (2.6, 4.5) | 29 (19, 40)       |                   |            | 16.8 (9.2, 27.4)  | 138 (69, 234)        |
| Lebanon                          | 4.5 (4.3, 4.7) | 4 (1, 6)          | 8.1 (-0.1, 19.6)  | 7 (0, 18)         | 4.4 (3.2, 5.6) | 4 (1, 6)          |                   |            | 15.2 (7.7, 25.7)  | 12 (4, 27)           |
| Lesotho                          | 6.2 (5.7, 6.6) | 15 (12, 18)       | 9.8 (-0.1, 23.7)  | 24 (0, 59)        | 3.7 (2.7, 4.9) | 9 (6, 13)         | 0.06 (0.03, 0.1)  | 0 (0, 0)   | 17.7 (8.8, 30.4)  | 44 (21, 77)          |

|                                  |                   |                |                   |               |                |                |                   |          |                   |                 |
|----------------------------------|-------------------|----------------|-------------------|---------------|----------------|----------------|-------------------|----------|-------------------|-----------------|
| Liberia                          | 8.3 (7.9, 8.6)    | 51 (39, 63)    | 7.1 (0.0, 17.7)   | 44 (0, 111)   | 5.2 (3.6, 6.9) | 32 (21, 45)    | 0.02 (0.01, 0.03) | 0 (0, 0) | 18.1 (11.8, 27.3) | 112 (66, 176)   |
| Libyan Arab Jamahiriya           | 2.6 (2.5, 2.7)    | 6 (4, 9)       | 13.5 (-0.1, 30.2) | 33 (0, 78)    | 4.4 (3.3, 5.6) | 11 (6, 17)     |                   |          | 18.6 (6.0, 34.3)  | 45 (14, 91)     |
| Madagascar                       | 6.5 (6.1, 6.8)    | 253 (209, 301) | 7.5 (-0.1, 18.3)  | 295 (-2, 717) | 4.8 (3.6, 6.1) | 188 (135, 252) | 0.01 (0.0, 0.02)  | 0 (0, 1) | 16.7 (10.0, 26.4) | 652 (365, 1052) |
| Malawi                           | 8.2 (7.7, 8.6)    | 266 (233, 299) | 8.3 (-0.1, 20.8)  | 271 (-2, 650) | 4.8 (3.6, 6.0) | 156 (113, 201) | 0.03 (0.02, 0.05) | 1 (0, 2) | 18.9 (11.5, 30.0) | 614 (370, 954)  |
| Malaysia                         | 1.6 (1.5, 1.7)    | 13 (8, 19)     | 7.8 (-0.1, 18.2)  | 65 (0, 156)   | 3.5 (2.6, 4.5) | 30 (16, 45)    |                   |          | 11.7 (4.4, 21.8)  | 97 (32, 195)    |
| Maldives                         | 4.7 (4.4, 4.9)    | 1 (0, 1)       | 7.8 (-0.1, 19.0)  | 1 (0, 3)      | 3.5 (2.6, 4.5) | 1 (0, 1)       |                   |          | 14.4 (7.3, 24.8)  | 2 (1, 4)        |
| Mali                             | 10.0 (9.6, 10.5)  | 312 (241, 388) | 9.4 (-0.1, 22.8)  | 290 (-2, 708) | 5.2 (3.7, 6.8) | 161 (106, 225) | 0.03 (0.01, 0.05) | 1 (0, 2) | 21.7 (13.7, 33.0) | 672 (401, 1068) |
| Marshall Islands                 | 4.5 (4.2, 4.7)    | 0 (0, 0)       | 9.9 (-0.1, 23.4)  | 0 (0, 1)      | 4.4 (2.9, 6.2) | 0 (0, 0)       |                   |          | 16.8 (7.6, 29.0)  | 0 (0, 1)        |
| Mauritania                       | 8.9 (8.5, 9.3)    | 36 (26, 46)    | 7.4 (0.0, 18.9)   | 30 (0, 78)    | 5.2 (3.7, 6.9) | 21 (13, 31)    | 0.02 (0.01, 0.04) | 0 (0, 0) | 19.0 (12.5, 29.1) | 78 (44, 125)    |
| Mauritius                        | 3.5 (3.2, 3.7)    | 1 (0, 1)       | 8.5 (-0.1, 21.5)  | 2 (0, 6)      | 3.5 (2.6, 4.5) | 1 (0, 2)       | 0.0 (0.0, 0.01)   | 0 (0, 0) | 14.0 (6.1, 26.1)  | 4 (1, 8)        |
| Mexico                           | 2.5 (2.3, 2.6)    | 97 (69, 127)   | 4.4 (0.0, 11.4)   | 173 (-1, 454) | 3.7 (2.7, 4.7) | 145 (93, 210)  |                   |          | 9.4 (5.3, 16.1)   | 369 (187, 640)  |
| Micronesia (Federated States of) | 4.5 (4.2, 4.7)    | 0 (0, 0)       | 7.1 (0.0, 17.9)   | 0 (0, 1)      | 4.4 (2.7, 6.0) | 0 (0, 0)       |                   |          | 14.2 (7.7, 23.9)  | 1 (0, 2)        |
| Mongolia                         | 1.4 (1.3, 1.5)    | 2 (2, 3)       | 7.3 (0.0, 17.6)   | 12 (0, 29)    | 2.9 (1.8, 4.0) | 5 (3, 7)       |                   |          | 10.5 (3.6, 20.8)  | 17 (6, 34)      |
| Morocco                          | 7.7 (7.4, 8.0)    | 159 (92, 223)  | 10.0 (-0.1, 24.1) | 209 (-2, 527) | 4.4 (3.2, 5.6) | 91 (48, 139)   |                   |          | 19.7 (11.0, 32.4) | 409 (168, 752)  |
| Mozambique                       | 10.7 (10.2, 11.2) | 503 (406, 595) | 6.9 (0.0, 17.1)   | 324 (-2, 820) | 4.8 (3.6, 6.0) | 226 (159, 304) | 0.04 (0.02, 0.07) | 2 (1, 3) | 19.8 (14.0, 28.4) | 935 (614, 1408) |
| Myanmar                          | 6.7 (6.3, 7.1)    | 303 (219, 395) | 7.2 (0.0, 18.2)   | 322 (-2, 813) | 3.5 (2.6, 4.5) | 158 (105, 226) |                   |          | 15.7 (9.2, 25.6)  | 708 (382, 1190) |
| Namibia                          | 6.4 (6.1, 6.7)    | 15 (11, 19)    | 7.6 (0.0, 18.8)   | 18 (0, 45)    | 3.7 (2.6, 4.8) | 9 (6, 13)      | 0.02 (0.01, 0.04) | 0 (0, 0) | 15.9 (9.1, 25.8)  | 38 (20, 64)     |
| Nepal                            | 7.5 (7.2, 7.9)    | 255 (217, 295) | 5.2 (0.0, 13.6)   | 178 (-1, 470) | 5.2 (3.8, 6.5) | 174 (125, 228) |                   |          | 15.8 (11.2, 23.2) | 536 (364, 801)  |

|                       |                   |                   |                   |                  |                |                  |                   |            |                   |                   |
|-----------------------|-------------------|-------------------|-------------------|------------------|----------------|------------------|-------------------|------------|-------------------|-------------------|
| Nicaragua             | 5.7 (5.4, 5.9)    | 18 (14, 22)       | 7.6 (-0.1, 18.5)  | 25 (0, 61)       | 3.7 (2.7, 4.8) | 12 (8, 17)       |                   |            | 15.3 (8.4, 25.4)  | 49 (26, 85)       |
| Niger                 | 10.9 (10.3, 11.4) | 594 (470, 715)    | 6.7 (0.0, 16.7)   | 364 (-3, 905)    | 5.2 (3.6, 6.8) | 282 (188, 394)   | 0.03 (0.01, 0.04) | 1 (1, 2)   | 20.1 (14.2, 28.7) | 1097 (733, 1615)  |
| Nigeria               | 5.6 (5.4, 5.9)    | 1560 (1244, 1878) | 5.7 (0.0, 14.4)   | 1589 (-11, 4108) | 5.2 (3.7, 6.9) | 1440 (980, 1990) | 0.04 (0.02, 0.06) | 10 (4, 17) | 14.5 (9.5, 22.4)  | 4034 (2455, 6399) |
| Oman                  | 4.5 (4.3, 4.7)    | 4 (3, 5)          | 8.2 (-0.1, 20.3)  | 7 (0, 18)        | 4.4 (3.3, 5.6) | 4 (2, 5)         |                   |            | 15.2 (7.9, 26.5)  | 13 (6, 24)        |
| Pakistan              | 7.5 (7.2, 7.9)    | 1862 (1519, 2224) | 7.4 (0.0, 18.2)   | 1819 (-11, 4417) | 5.2 (3.8, 6.5) | 1273 (886, 1683) |                   |            | 17.7 (11.2, 27.3) | 4373 (2646, 6771) |
| Panama                | 2.5 (2.3, 2.7)    | 3 (1, 4)          | 6.9 (0.0, 17.3)   | 7 (0, 18)        | 3.7 (2.7, 4.7) | 4 (2, 6)         |                   |            | 11.8 (5.3, 21.6)  | 12 (4, 23)        |
| Papua New Guinea      | 9.7 (9.3, 10.1)   | 79 (51, 107)      | 7.5 (-0.1, 18.7)  | 61 (0, 157)      | 4.4 (2.8, 6.2) | 36 (19, 57)      |                   |            | 19.3 (12.8, 28.9) | 157 (89, 257)     |
| Paraguay              | 3.5 (3.3, 3.8)    | 7 (4, 11)         | 9.3 (-0.1, 22.3)  | 20 (0, 52)       | 3.4 (2.3, 4.7) | 7 (3, 12)        |                   |            | 14.8 (6.2, 26.8)  | 31 (10, 63)       |
| Peru                  | 2.5 (2.3, 2.6)    | 37 (31, 42)       | 7.4 (-0.1, 18.2)  | 109 (-1, 269)    | 5.0 (3.8, 6.3) | 75 (54, 97)      |                   |            | 13.1 (6.4, 23.1)  | 194 (93, 349)     |
| Philippines           | 1.8 (1.7, 2.0)    | 152 (126, 178)    | 7.8 (-0.1, 18.8)  | 639 (-5, 1501)   | 3.5 (2.6, 4.5) | 289 (202, 392)   |                   |            | 11.9 (4.5, 22.4)  | 977 (366, 1790)   |
| Qatar                 | 3.4 (3.3, 3.6)    | 1 (0, 1)          | 13.4 (-0.1, 30.9) | 2 (0, 7)         | 4.4 (3.3, 5.6) | 1 (0, 2)         |                   |            | 19.2 (6.8, 35.7)  | 4 (0, 9)          |
| Rwanda                | 9.5 (9.1, 9.9)    | 171 (146, 197)    | 10.4 (-0.1, 25.1) | 188 (-1, 437)    | 4.8 (3.6, 6.1) | 87 (62, 115)     | 0.03 (0.01, 0.04) | 0 (0, 1)   | 21.9 (12.9, 34.8) | 395 (229, 612)    |
| Samoa                 | 4.5 (4.2, 4.7)    | 0 (0, 1)          | 6.7 (0.0, 16.9)   | 1 (0, 1)         | 4.4 (2.8, 6.2) | 0 (0, 1)         |                   |            | 13.8 (7.5, 23.4)  | 1 (0, 2)          |
| Sao Tome and Principe | 8.6 (8.2, 9.0)    | 1 (1, 2)          | 8.8 (-0.1, 22.0)  | 1 (0, 3)         | 5.2 (3.7, 6.7) | 1 (1, 1)         | 0.02 (0.01, 0.03) | 0 (0, 0)   | 19.9 (12.4, 31.4) | 3 (2, 5)          |
| Saudi Arabia          | 3.2 (3.0, 3.3)    | 25 (15, 36)       | 9.3 (-0.1, 22.6)  | 74 (0, 193)      | 4.4 (3.2, 5.6) | 35 (19, 54)      |                   |            | 15.1 (6.6, 27.4)  | 120 (47, 241)     |
| Senegal               | 8.4 (8.1, 8.8)    | 129 (104, 154)    | 6.5 (0.0, 16.5)   | 100 (-1, 250)    | 5.2 (3.7, 6.8) | 79 (54, 108)     | 0.02 (0.01, 0.03) | 0 (0, 1)   | 17.7 (12.0, 26.4) | 272 (174, 411)    |
| Seychelles            | 4.8 (4.5, 5.1)    | 0 (0, 0)          | 6.2 (0.0, 15.5)   | 0 (0, 0)         | 3.5 (2.6, 4.5) | 0 (0, 0)         |                   |            | 13.1 (7.4, 21.7)  | 0 (0, 1)          |
| Sierra Leone          | 9.3 (8.8, 9.7)    | 92 (71, 114)      | 8.6 (-0.1, 21.4)  | 85 (-1, 213)     | 5.2 (3.7, 6.7) | 51 (33, 72)      | 0.02 (0.01, 0.04) | 0 (0, 0)   | 20.3 (12.9, 31.3) | 201 (114, 320)    |

|                      |                |                |                   |                |                |                |                   |          |                   |                  |
|----------------------|----------------|----------------|-------------------|----------------|----------------|----------------|-------------------|----------|-------------------|------------------|
| Solomon Islands      | 4.5 (4.2, 4.7) | 3 (2, 3)       | 5.4 (0.0, 14.0)   | 3 (0, 8)       | 4.4 (2.7, 6.1) | 3 (2, 4)       |                   |          | 12.6 (7.7, 20.4)  | 7 (4, 12)        |
| Somalia              | 8.3 (8.0, 8.7) | 178 (124, 227) | 9.5 (-0.1, 22.8)  | 201 (-1, 490)  | 4.8 (3.6, 6.1) | 103 (65, 144)  |                   |          | 20.0 (11.9, 31.8) | 427 (231, 706)   |
| South Africa         | 1.9 (1.8, 2.0) | 55 (42, 68)    | 6.7 (0.0, 16.7)   | 191 (-1, 480)  | 3.7 (2.7, 4.8) | 105 (72, 145)  | 0.06 (0.03, 0.09) | 2 (1, 3) | 11.1 (4.8, 20.3)  | 315 (132, 601)   |
| Sri Lanka            | 1.3 (1.2, 1.4) | 9 (7, 11)      | 7.3 (-0.1, 18.4)  | 50 (0, 126)    | 3.5 (2.6, 4.5) | 24 (17, 33)    |                   |          | 10.9 (4.0, 21.5)  | 75 (27, 148)     |
| St. Lucia            | 2.6 (2.4, 2.7) | 0 (0, 0)       | 6.7 (0.0, 17.0)   | 0 (0, 1)       | 3.4 (2.3, 4.5) | 0 (0, 0)       |                   |          | 11.5 (5.2, 21.4)  | 1 (0, 2)         |
| St. Vincent          | 2.6 (2.4, 2.7) | 0 (0, 0)       | 8.2 (-0.1, 20.3)  | 0 (0, 1)       | 3.4 (2.4, 4.5) | 0 (0, 0)       |                   |          | 12.8 (5.1, 24.1)  | 0 (0, 1)         |
| State of Palestine   | 4.5 (4.3, 4.7) | 9 (6, 12)      | 10.2 (-0.1, 24.3) | 20 (0, 49)     | 4.4 (3.3, 5.6) | 9 (5, 13)      |                   |          | 17.2 (7.9, 30.1)  | 33 (14, 63)      |
| Sudan                | 9.4 (9.0, 9.8) | 477 (381, 571) | 12.2 (-0.1, 28.1) | 625 (-4, 1462) | 4.8 (3.6, 6.1) | 246 (176, 325) |                   |          | 23.4 (12.8, 37.2) | 1191 (624, 1955) |
| Suriname             | 2.6 (2.4, 2.7) | 0 (0, 0)       | 8.2 (-0.1, 19.9)  | 1 (0, 2)       | 3.4 (2.4, 4.6) | 0 (0, 1)       |                   |          | 12.8 (5.1, 23.8)  | 2 (1, 3)         |
| Swaziland            | 4.1 (3.8, 4.4) | 6 (5, 7)       | 8.3 (-0.1, 20.3)  | 12 (0, 30)     | 3.7 (2.7, 4.8) | 5 (4, 7)       | 0.05 (0.03, 0.09) | 0 (0, 0) | 14.6 (6.9, 25.7)  | 21 (10, 38)      |
| Syrian Arab Republic | 6.6 (6.2, 7.0) | 101 (76, 127)  | 9.4 (-0.1, 22.3)  | 143 (-1, 359)  | 4.4 (3.2, 5.6) | 67 (45, 93)    |                   |          | 18.3 (9.7, 29.8)  | 278 (143, 486)   |
| Taiwan               | 0.2 (0.2, 0.2) | 1 (0, 1)       | 4.0 (0.0, 10.5)   | 17 (0, 51)     | 2.1 (1.0, 3.2) | 9 (2, 17)      |                   |          | 5.7 (1.8, 11.9)   | 24 (4, 59)       |
| Tajikistan           | 0.1 (0.1, 0.1) | 1 (1, 1)       | 6.8 (0.0, 16.9)   | 68 (0, 169)    | 2.9 (1.8, 4.1) | 29 (16, 43)    |                   |          | 8.9 (2.3, 18.8)   | 89 (22, 191)     |
| Thailand             | 5.0 (4.8, 5.3) | 58 (39, 76)    | 8.4 (-0.1, 20.2)  | 95 (-1, 239)   | 3.5 (2.6, 4.5) | 40 (24, 58)    |                   |          | 15.3 (7.6, 26.3)  | 175 (79, 315)    |
| Timore Leste         | 4.8 (4.5, 5.1) | 12 (9, 14)     | 9.2 (-0.1, 22.4)  | 23 (0, 56)     | 3.5 (2.6, 4.5) | 9 (6, 11)      |                   |          | 15.9 (7.4, 28.1)  | 39 (17, 71)      |
| Togo                 | 7.8 (7.5, 8.1) | 65 (54, 75)    | 6.6 (0.0, 17.0)   | 55 (0, 138)    | 5.1 (3.7, 6.8) | 42 (29, 59)    | 0.02 (0.01, 0.04) | 0 (0, 0) | 17.3 (11.5, 26.2) | 143 (91, 217)    |
| Tonga                | 1.6 (1.4, 1.7) | 0 (0, 0)       | 6.7 (-0.1, 16.7)  | 0 (0, 1)       | 4.4 (2.8, 6.2) | 0 (0, 0)       |                   |          | 11.2 (4.9, 20.7)  | 1 (0, 1)         |
| Trinidad and Tobago  | 1.1 (1.0, 1.1) | 0 (0, 0)       | 8.8 (-0.1, 21.2)  | 2 (0, 5)       | 3.4 (2.4, 4.5) | 1 (0, 1)       |                   |          | 12.1 (3.7, 23.9)  | 2 (0, 6)         |
| Tunisia              | 5.0 (4.7, 5.2) | 9 (5, 14)      | 10.2 (-0.1, 24.4) | 19 (0, 50)     | 4.4 (3.3, 5.7) | 8 (4, 13)      |                   |          | 17.5 (8.2, 30.5)  | 33 (12, 65)      |

|                             |                |                |                   |                |                |                |                   |          |                   |                   |
|-----------------------------|----------------|----------------|-------------------|----------------|----------------|----------------|-------------------|----------|-------------------|-------------------|
| Turkey                      | 5.1 (4.9, 5.4) | 137 (77, 196)  | 10.1 (-0.1, 24.1) | 269 (-1, 676)  | 4.4 (3.2, 5.6) | 117 (63, 179)  |                   |          | 17.6 (8.5, 30.3)  | 468 (194, 890)    |
| Turkmenistan                | 0.1 (0.1, 0.1) | 0 (0, 0)       | 9.1 (-0.1, 21.5)  | 23 (0, 62)     | 2.9 (1.8, 4.1) | 7 (3, 12)      |                   |          | 11.2 (2.3, 23.4)  | 29 (5, 68)        |
| Uganda                      | 8.4 (7.9, 8.9) | 586 (443, 732) | 9.1 (-0.1, 22.5)  | 635 (-5, 1559) | 4.8 (3.6, 6.0) | 335 (227, 466) | 0.04 (0.02, 0.06) | 2 (1, 4) | 19.8 (11.9, 31.3) | 1379 (756, 2249)  |
| United Arab Emirates        | 2.0 (1.9, 2.1) | 2 (0, 3)       | 11.3 (-0.1, 27.3) | 10 (0, 29)     | 4.4 (3.3, 5.7) | 4 (1, 8)       |                   |          | 16.0 (5.2, 31.2)  | 15 (1, 35)        |
| United Republic of Tanzania | 8.4 (7.9, 8.9) | 858 (733, 989) | 9.2 (-0.1, 22.6)  | 942 (-8, 2308) | 4.8 (3.6, 6.1) | 490 (350, 632) | 0.03 (0.01, 0.05) | 3 (1, 5) | 19.9 (11.8, 31.6) | 2029 (1152, 3229) |
| Uruguay                     | 3.3 (3.0, 3.5) | 1 (0, 3)       | 7.1 (0.0, 18.5)   | 3 (0, 9)       | 3.0 (1.6, 4.6) | 1 (0, 3)       |                   |          | 12.2 (5.4, 22.9)  | 5 (1, 12)         |
| Uzbekistan                  | 0.0 (0.0, 0.0) | 1 (0, 1)       | 8.1 (-0.1, 19.6)  | 133 (-1, 324)  | 2.9 (1.9, 4.0) | 48 (27, 73)    |                   |          | 10.1 (2.4, 21.2)  | 166 (34, 355)     |
| Vanuatu                     | 4.5 (4.2, 4.7) | 1 (1, 1)       | 6.7 (0.0, 16.5)   | 1 (0, 4)       | 4.4 (2.8, 6.1) | 1 (1, 1)       |                   |          | 13.9 (7.8, 22.8)  | 3 (1, 5)          |
| Venezuela                   | 5.3 (5.0, 5.5) | 32 (6, 58)     | 7.7 (-0.1, 18.8)  | 46 (-2, 139)   | 3.7 (2.6, 4.8) | 22 (4, 44)     |                   |          | 15.0 (8.0, 25.0)  | 91 (16, 198)      |
| Viet Nam                    | 5.5 (5.1, 5.9) | 284 (236, 341) | 6.2 (0.0, 15.9)   | 321 (-2, 812)  | 3.5 (2.6, 4.5) | 182 (129, 244) |                   |          | 13.8 (8.1, 22.6)  | 709 (405, 1154)   |
| Yemen                       | 9.1 (8.7, 9.6) | 464 (356, 583) | 10.3 (-0.1, 24.4) | 525 (-4, 1254) | 4.4 (3.2, 5.6) | 226 (150, 320) |                   |          | 21.2 (12.2, 33.8) | 1080 (584, 1778)  |
| Zambia                      | 6.5 (6.2, 6.9) | 210 (172, 248) | 8.3 (-0.1, 20.6)  | 266 (-2, 654)  | 4.8 (3.6, 6.1) | 154 (108, 204) | 0.04 (0.01, 0.07) | 1 (0, 2) | 17.4 (10.0, 28.5) | 559 (313, 918)    |
| Zimbabwe                    | 3.8 (3.5, 4.0) | 69 (58, 80)    | 9.1 (-0.1, 21.8)  | 166 (-1, 395)  | 3.7 (2.7, 4.9) | 68 (48, 93)    | 0.03 (0.02, 0.05) | 1 (0, 1) | 15.0 (6.6, 27.0)  | 274 (119, 490)    |

<sup>a</sup>Only estimated for 45 countries

**Appendix Figure 1:** Stunting prevalence attributable to the combined effect of maternal depression, intimate partner violence, and low maternal education

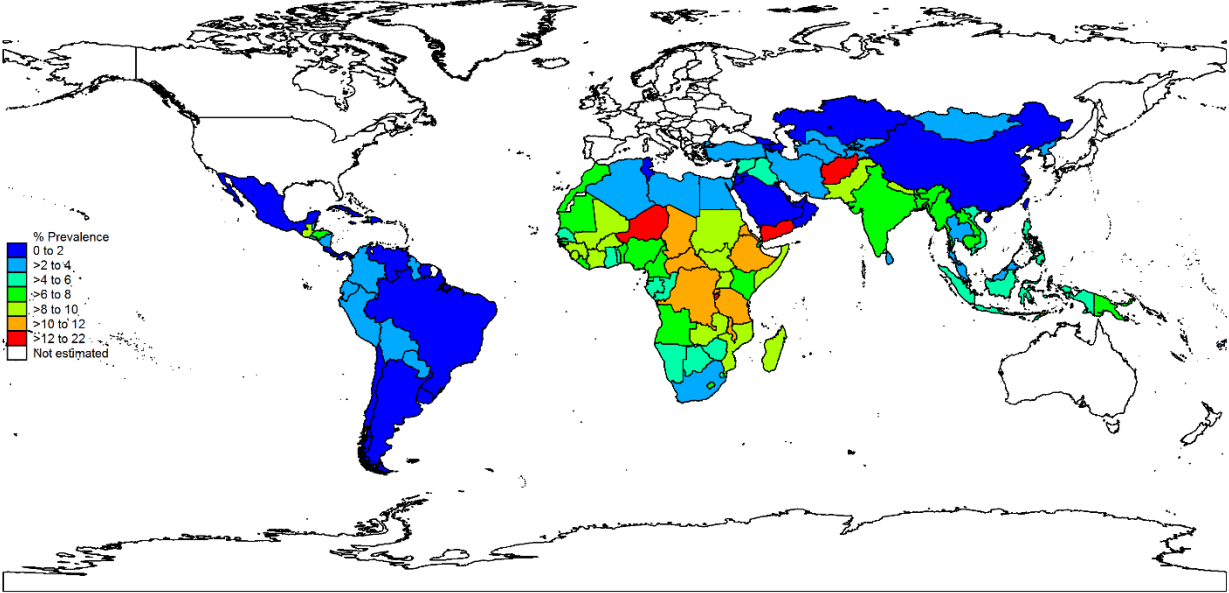

**Appendix Figure 2:** PAF of stunting attributable by country to (A) low maternal education; (B) maternal depression; (C) intimate partner violence; (D) orphanhood; (E) jointly to low maternal education, maternal depression, intimate partner violence

(A)

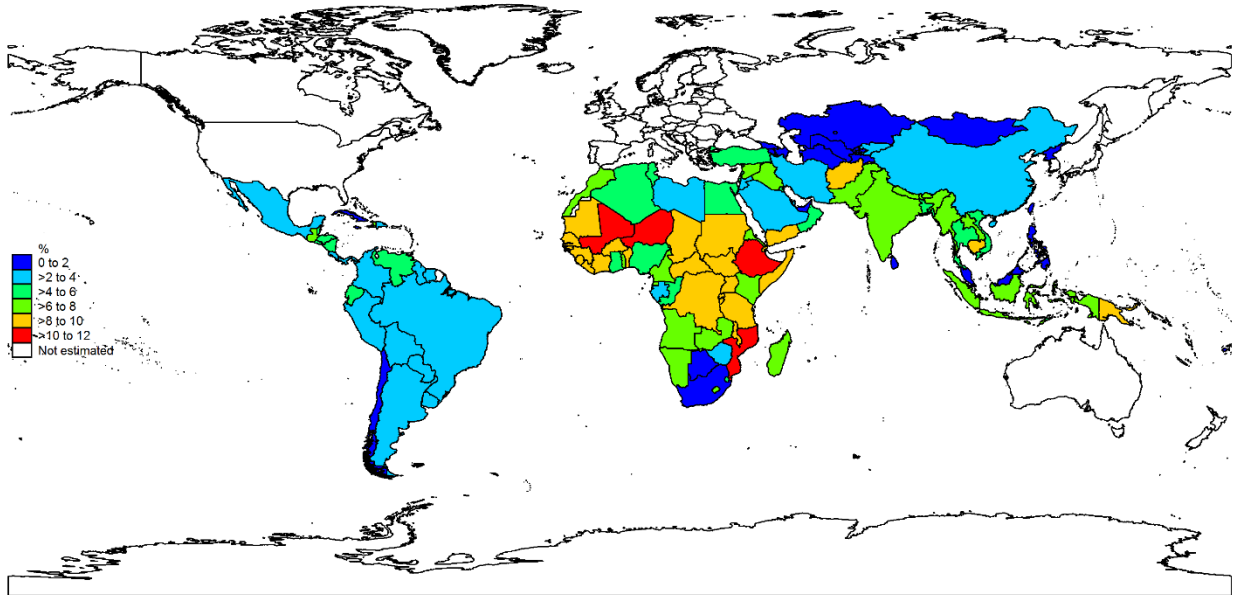

(B)

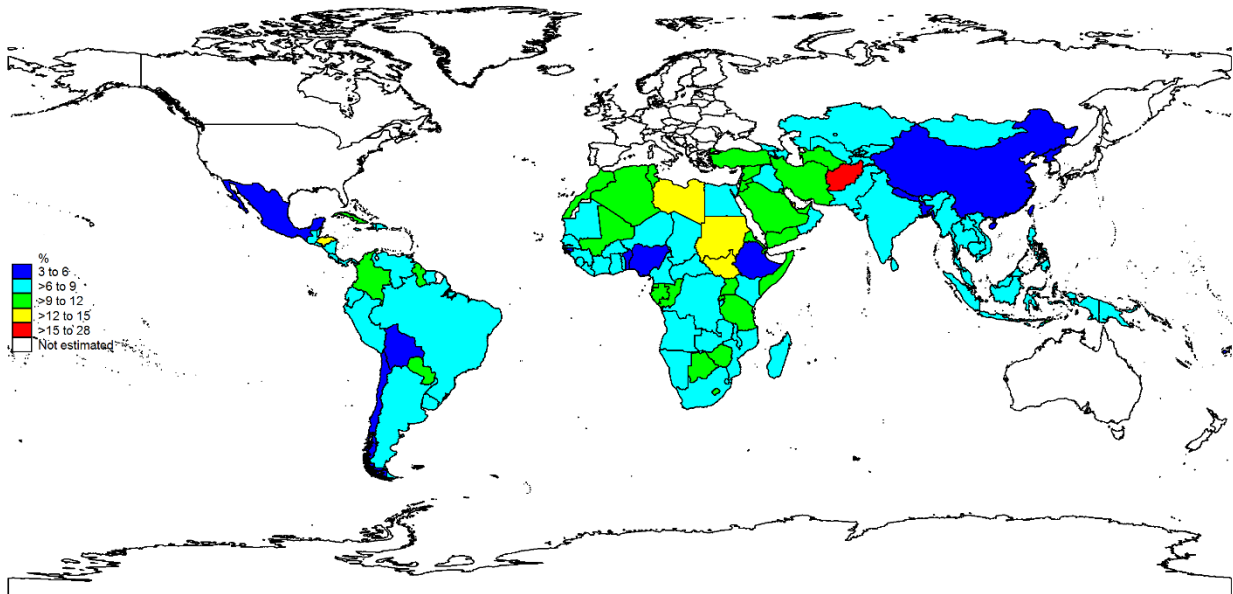



(C)

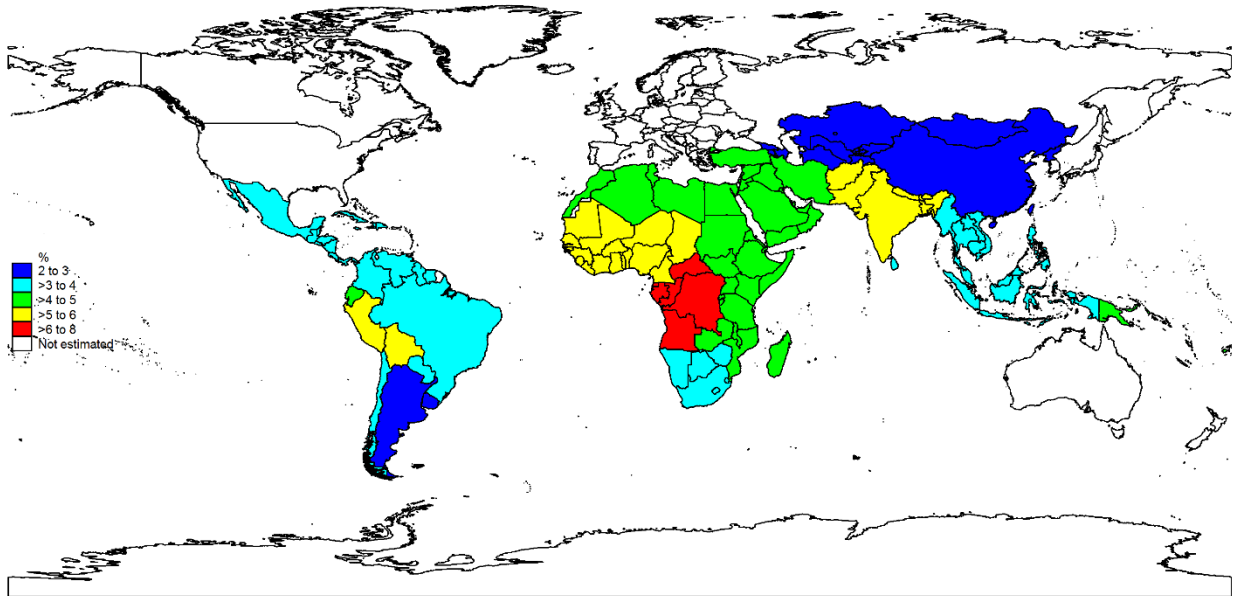

(D)

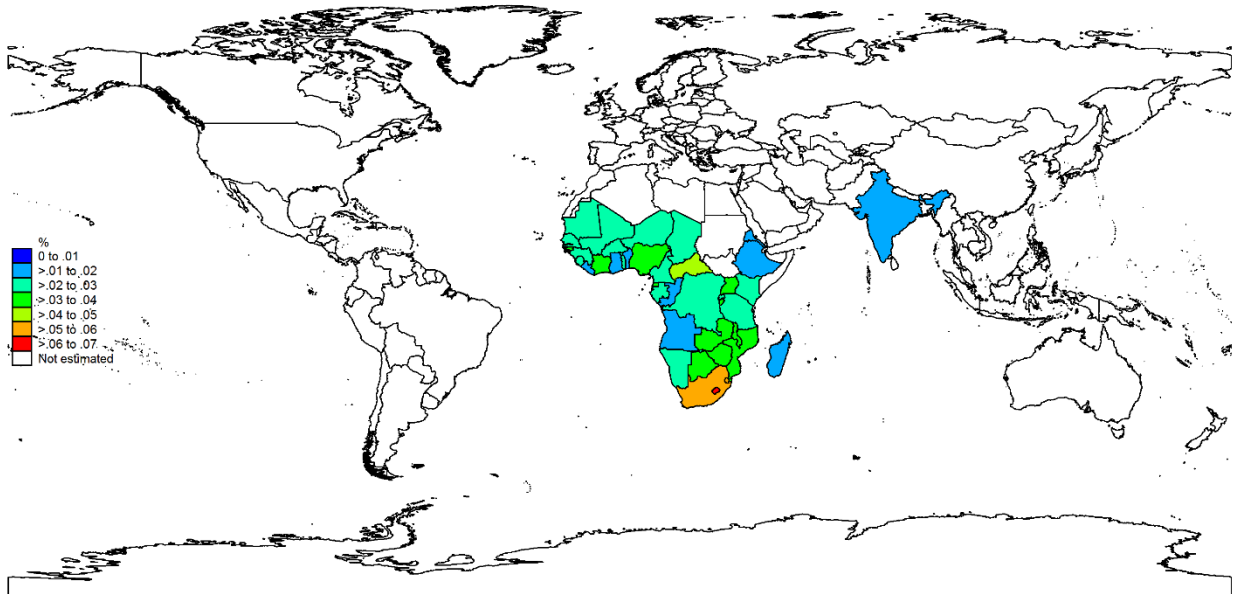

(E)

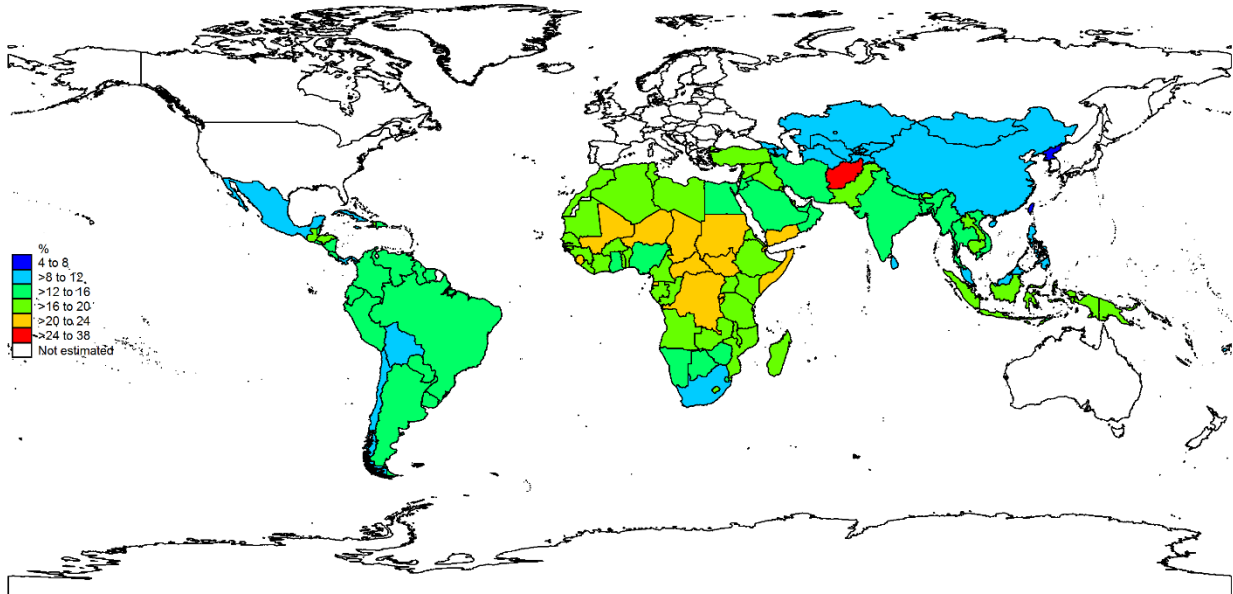

**Appendix Figure 3:** Scatter plot and regression line to show the linear relationship between height-for-age Z scores (HAZ) and prevalence of stunting

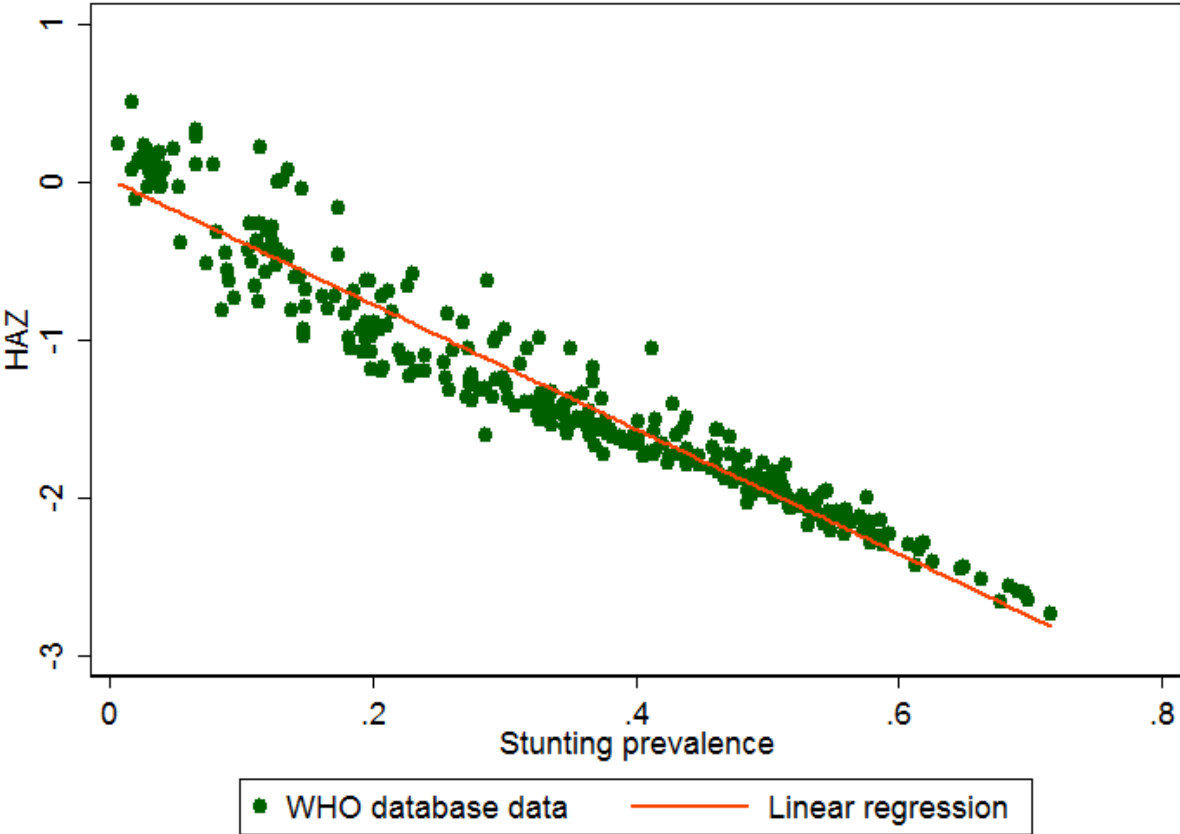

## References

---

- <sup>1</sup> World Health Organization. Nutrition Landscape Information System: Global Database on Child Growth and Malnutrition. 2016. <http://apps.who.int/nutrition/landscape/search.aspx> (accessed April 17, 2016).
- <sup>2</sup> Stevens GA, Finucane MM, Paciorek CJ, Flaxman SR, White RA, Donner AJ, Ezzati M; Nutrition Impact Model Study Group (Child Growth). Trends in mild, moderate, and severe stunting and underweight, and progress towards MDG 1 in 141 developing countries: a systematic analysis of population representative data. *Lancet* 2012; 380(9844):824-34.
- <sup>3</sup> Danaei G, Andrews KG, Sudfeld C, Fink G, McCoy DC, Peet E, Sania A, Smith Fawzi MC, Ezzati M, Fawzi W. Risk factors for childhood stunting in 137 developing countries: a comparative risk assessment analysis at global, regional, and country levels. *PLOS Medicine* 2016; 13(11):e1002164.
- <sup>4</sup> Fink G, Peet E, Danaei G, Andrews K, McCoy DC, Sudfeld CR, Smith Fawzi MC, Ezzati M, Fawzi WW. Schooling and wage income losses due to early-childhood growth faltering in developing countries: national, regional, and global estimates. *Am J Clin Nutr* 2016; 104(1):104-12.
- <sup>5</sup> Adair LS, Fall CH, Osmond C, Stein AD, Martorell R, Ramirez-Zea M, Sachdev HS, Dahly DL, Bas I, Norris SA, Micklesfield L, Hallal P, Victora CG; COHORTS group. Associations of linear growth and relative weight gain during early life with adult health and human capital in countries of low and middle income: findings from five birth cohort studies. *Lancet*. 2013 Aug 10;382(9891):525-34.
